# Supplementary material for: Maternal circulating miRNAs that predict infant FASD outcomes influence placental maturation
Source: Life Sci Alliance. 2019 Mar 4;2(2):e201800252. doi: 10.26508/lsa.201800252 (PMC6399548; doi:10.26508/lsa.201800252)
Supplement: Supplementary file 1 [file LSA-2018-00252_TableS1.xlsx]

## Sheet: Supplementary Table 1
Supplementary Table 1: HEamiRNAs collectively explain the variance in independent measures of infant size
	2nd Trimester R2	3rd Trimester R2
Weight	24.983	13.303
Height	24.568	13.505
Head Circumference	31.844	28.675
